# Supplementary material for: Photoluminescent properties of Ce3+ in compounds Ba2Ln(BO3)2Cl (Ln = Gd and Y)
Source: Royal Society of Chemistry journal article supplement (doi:10.1039/c2jm32761a), 2012-01-01
Supplement: c2jm32761a.pdf [file c2jm32761a.pdf]

## Supporting Information

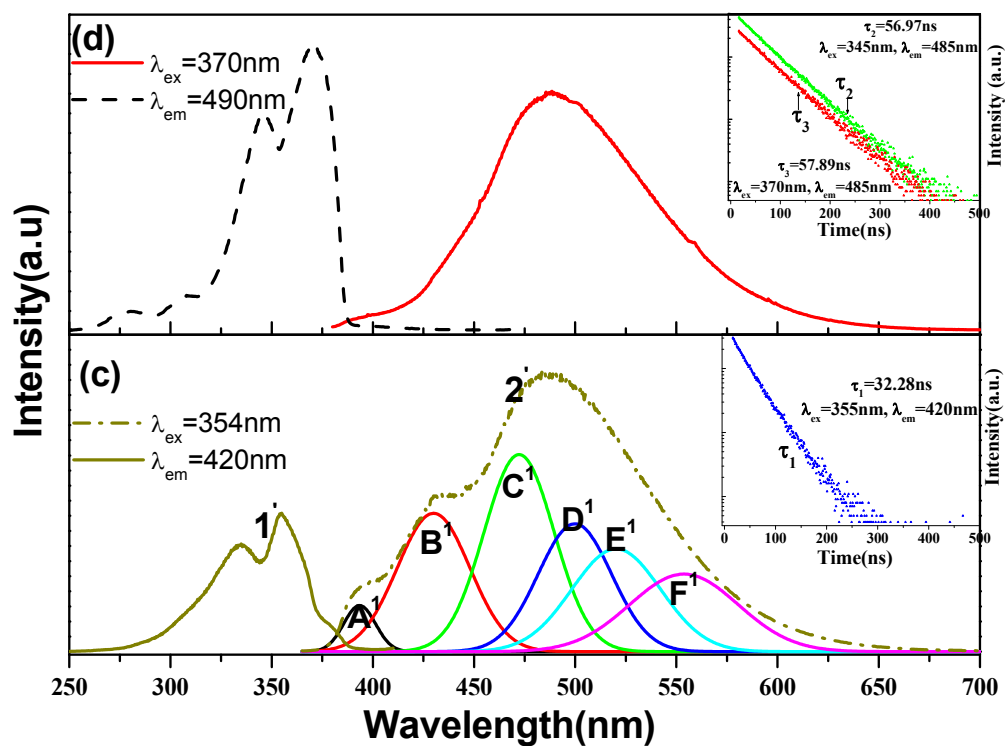

Fig. PL and PLE spectra of phosphors  $\text{Ba}_2\text{Y}(\text{BO}_3)_2\text{Cl}:3.0\%\text{Ce}^{3+}$  at LTH. Insets: The decay curves of  $\text{Ce}^{3+}$  at different sites displayed on a logarithmic intensity scale at LTH.
